# Supplementary material
Source: publisher site journal article supplement (https://arthropod-systematics.arphahub.com/article/67569/download/suppl/31/)
Supplement: Supplementary file 1

## Supplement 1

### List of abbreviations used in text and illustrations (with some explanations)

#### Head

**ata** anterior tentorial arm  
**atb** anterior tentorial bridge  
**atp** anterior tentorial pit  
**car** cardo of maxilla  
**cap** circumantennal pit  
**capb** bottom of circumantennal pit  
**capd** sharp dorsal edge of circumantennal pit  
**cc** coronal cleavage line  
**cpe** compound eye  
**ct** corpotentorium  
**fc** frontal cleavage line  
**fl** flagellum (flagellomeres numbered from base as **fl1** etc.)  
**li** lacinia  
**lp** labial palpus (**I–III**: palpomeres)  
**md** mandible [right **md<sup>r</sup>**, left **md<sup>l</sup>**] (**I–IV**: tip and incisivi)  
**me** meriston (growth zone) of antennal flagellum  
**mo** mola of mandible  
**mp** maxillary palpus (**I–V**: palpomeres)  
**pc** pedicellus  
**pta** posterior tentorial arm  
**sc** scapus  
**sc-pc** scapus-pedicellus articulation  
**scex** dorsal excavation at distal end of scapus  
**s-chA** field of sensilla chaetica A  
**s-cpf** row of sensilla campaniformia  
**sti** stipes of maxilla  
**tp** tentorial perforation

#### Thorax (except for legs)

**fwar** forewing articulation area  
**hw** hindwing  
**hwar** (reduced) hindwing articulation area  
**N** thoracic notum (**N1** pro-, **N2** meso-, **N3** metanotum)

#### Legs

**as** apical spines of tibia (= terminal spines **Tt1–5** plus distidorsal spine **Td1m** [mid- and hindleg] and **Td1a** [foreleg])  
**co** coxa  
**colb** coxal lobelet  
**dft** dorsal fold on apical margin of tibia  
**ds** dorsal spines of tibia (= dorsal spines **Td** but excluding **Td1m** [mid- and hindleg] and **Td1a** [foreleg])  
**fane** anteroventral edge flanking femoral groove  
**fe** femur  
**fegr** ventral groove of femur  
**fpoe** posteroventral edge flanking femoral groove  
**gs** genicular spine of femur  
**itts** intertibiotalar sclerite, a small sclerite between tibia and tarsus  
**pdta** posterodorsal tibiotarsal articulation  
**ptar** arolium of pretarsus  
**ptcl** claws of pretarsus

**ta1–5** tarsomeres 1–5  
**tc** trochanter  
**Td** dorsal spine of tibia (+ number + lower case letter, e.g. **Td3p**)  
**Td1m** distidorsal spine of tibia  
**ti** tibia  
**tiaa** anterior articulation of tibia with femur  
**tiap** posterior articulation of tibia with femur  
**tivt** ventral basal tendon of tibia  
**Tt1–5** terminal spines of tibia (= apical spines **as** but excluding **Td1m** [mid- and hindleg] and **Td1a** [foreleg])  
**Tv** ventral spine of tibia (+ number + lower case letter, e.g. **Tv3a**)  
**Tv1a** distiventral spine of tibia  
**vs** ventral spines of tibia (= ventral spines **Tv**)

### Abdomen (except for genitalia)

[*n* is a placeholder for a sequential number if this is not in the terminal position of an abbreviation; it essentially represents the number of the abdominal segment]  
**ac** antecosta on abdominal tergite (numbered, e.g. **ac9**)  
**Ca** sclerite at mesal base of cercus  
**ce** cercus  
**hmp** hook-like mesal projection of paraproct  
**ITn-b** movable anterotergal bending line of abdominal dorsum (numbered, e.g. **IT4-b**)  
**ltga9** lateral tergal apodeme of tergite **T9**  
**msa1** anterior median specialisation of tergite **T1** of male (strengthened microreticulation)  
**msl2** lateral specialisation of tergite **T2** of male  
**msp1** posterior median specialisation of tergite **T1** of male (weak sclerotisation and long bristles)  
**pg** pores of glands of male tergal specialisations  
**PP** paraproct [right **PP<sup>r</sup>**, left **PP<sup>l</sup>**]  
**pt9** ventromesad directed extension of paratergite 9 of male (likely with tergite 8 not contributing)  
**pt8,9** ventromesad directed extension of paratergite 9 of female (likely with tergite 8 contributing)  
**S** abdominal (coxo)sternite (numbered, e.g. **S3**)  
**sl** stylus (upon male subgenital lobe **vf9**) [right **sl<sup>r</sup>**, left **sl<sup>l</sup>**]  
**Sn-p** posterior border of sternite = posterosternal bending line (numbered, e.g. **S3-p**)  
**sr** transversal ridge of abdominal sternite (numbered, e.g. **sr4**)  
**sta9** anterior sternal apodeme of abdominal (coxo)sternite 9 of male  
**T** abdominal tergite (numbered, e.g. **T3**)  
**Tnp** ventrally bent lateral (paratergal) parts of tergite (numbered, e.g. **T9p**)  
**Tn-a** anterior border of tergite = anterior tergal margin (numbered, e.g. **T3-a**)  
**Tn-p** posterior border of tergite = posterotergal bending line (numbered, e.g. **T3-p**)  
**tr** transversal ridge of abdominal tergite (numbered, e.g. **tr6**)  
**vf** ventral fold formed by posterior part of an abdominal segment (numbered, e.g. **vf4**; medially fused coxal lobes)  
**vf7** subgenital lobe of female = ventral fold of abdominal segment 7  
**vf9** subgenital lobe of male = ventral fold of abdominal segment 9

### Female genitalia and subgenital plate

**A** articulations: **A1** between **gg-l** and **pt8,9**, **A2** between **gg-m** and **pl**, **A3** between **gg-m** and basal sclerotisation of **v1**, **A5** between **pt8,9** and **vlf**  
**aa** anterior arch (of coxa of segment 9)  
**ac9** antecosta on abdominal tergite 9  
**ca** central apodeme (of segment 9)  
**gc** genital chamber (with ventral wall **gc<sup>v</sup>** and dorsal wall **gc<sup>d</sup>**)  
**gcf** fold dividing genital chamber horizontally  
**gcp** pouch of genital chamber (one-sided)  
**gg** gonangulum (with mesal sclerite **gg-m** and lateral sclerite **gg-l**) (of laterocoxa of segment 9)  
**IC** intercalary sclerite  
**isf** intersternal fold (on female subgenital lobe **vf7**)  
**ls** laterosternal-shelf sclerite (with its parts **ls-a** = arm, **ls-c** = center, **ls-w** = wing, and **ls-p** posterolateral extremity)  
**lst** laterosternal-shelf tube  
**mct** mesal cleft of laterosternal-shelf tube  
**oc** common oviduct  
**otkl** ootheca keel  
**pl** posterior lobe (of coxa of segment 9)  
**pt8,9** ventromesad directed extension of paratergite 9 (likely with tergite 8 contributing)  
**pti** paratergal invagination (of segment 9)  
**S7** subgenital plate = abdominal (coxo)sternite 7

**S7-p** posterior border of sternite 7 = posterosternal bending line  
**sp** spermathecal plate  
**sr7** transversal ridge of abdominal sternite 7 (with lateral parts **sr7-l** and median parts **sr7-m**)  
**v1** 1<sup>st</sup> valves of ovipositor (gonapophyses of segment 8)  
**v2** 2<sup>nd</sup> valves of ovipositor (gonapophyses of segment 9)  
**v3** 3<sup>rd</sup> valves of ovipositor (gonoplaes of segment 9)  
**vf7** subgenital lobe = ventral fold of abdominal segment 7  
**vf1** floor of vestibulum (= dorsal wall of subgenital lobe **vf7**)  
**vlf** valvifer (of coxa of segment 8)  
**vtf** vestibular transversal fold (on female subgenital lobe **vf7**)

### Male genitalia and subgenital plate

**A** articulations: **A1** between **S9** and **pt9**, **A3** between sclerites **R3** and **R1** (or its subsclerite **R1P**)  
**ac9** antecosta on abdominal tergite 9  
**cs** cleft sclerite of right phallomere (composed of the dorsally fused **R1S** and **R2**, **R2**-part in contact with arm **v** of **R3**)  
**ea** endophallic apodeme  
**h** hook of left phallomere (with long membranous proximal part **p**, broad base **b** of sclerotised part, neck **n**, and claw **cl**)  
**hcl** cleft in wall of groove **hge** of hook  
**hge** groove upon claw part of hook  
**L2** sclerotisation of endophallic apodeme (**ea**) and of processes arising near its base (virga **vi**, process **psa**)  
**psa** the mesal process arising at base of endophallic apodeme  
**pt9** ventromesad directed extension of paratergite 9 (likely with tergite 8 not contributing)  
**R1** posterodorsal sclerite(s) of right phallomere (often divided, e.g. in **R1S** and **R1P**)  
**R2** posteroventral sclerite of right phallomere  
**R3** anterior sclerite of right phallomere (with its parts **a** = anterior arm, **d** = dorsoposterior arm, **v** = ventroposterior arm)  
**S9** subgenital plate = abdominal (coxo)sternite 9  
**sl** stylus (upon subgenital lobe **vf9**) [right **sl<sup>r</sup>**, left **sl<sup>l</sup>**]  
**sta9** anterior sternal apodeme of abdominal (coxo)sternite 9  
**tve** virga tendon  
**vf9** subgenital lobe = ventral fold of abdominal segment 9  
**vge** virga groove (running along virga), partly two grooves distinguished as **vge1** and **vge2**  
**vi** virga, the lateral process arising at base of endophallic apodeme  
**vla** ventral lobe of left phallomere (= “ventral phallomere”)
